# Supplementary material
Source: PubMed Central journal article supplement (PMC6595219)
Supplement: NIHMS1036946-supplement-Supplemental_file.pdf [file NIHMS1036946-supplement-Supplemental_file.pdf]

## Supplementary information

### **Microbiome remodeling leads to inhibition of intestinal farnesoid X receptor signaling and decreased obesity**

Fei Li<sup>1</sup>, Changtao Jiang<sup>1</sup>, Kristopher W. Krausz, Yunfei Li, Istvan Albert, Haiping Hao, Kristin M. Fabre, James B. Mitchell, Andrew D. Patterson & Frank J. Gonzalez

<sup>1</sup>These authors contributed equally to this work.

## Supplementary Figures

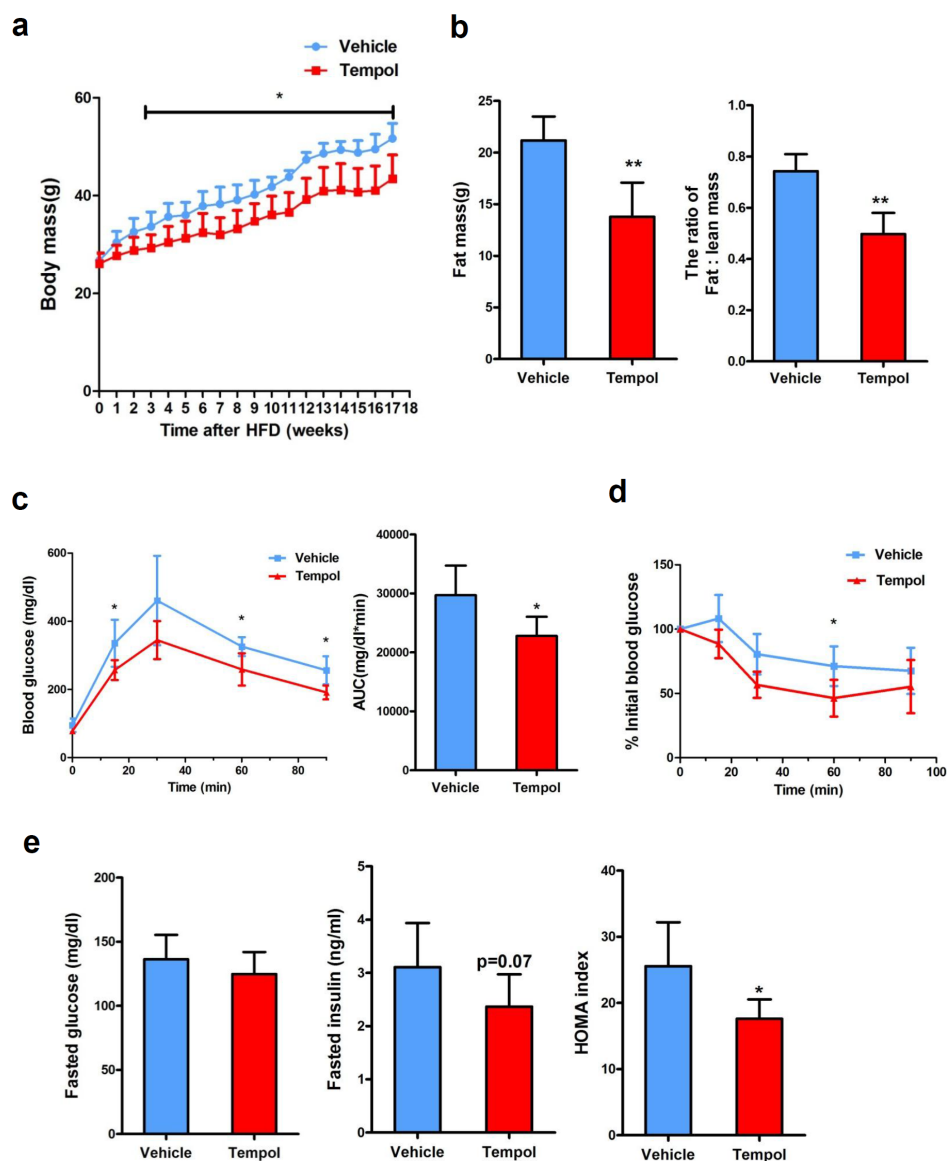

### Supplementary Figure S1. Tempol ameliorates HFD-induced obesity and glucose intolerance.

(a) Growth curves of vehicle and tempol-treated mice on a HFD. n=5 mice per group.  
 (b) Body composition by NMR to show the fat mass (left) and fat mass to lean mass ratio (right) in vehicle and tempol-treated mice after 16 weeks of HFD. n=5 mice per group.  
 (c) Glucose tolerance test (GTT) and the area under the curve (AUC) after 11 weeks of HFD. n=5 mice per group.  
 (d) Insulin tolerance test (ITT) after 14 weeks of HFD. n=5 mice per group.  
 (e) Fasted glucose, fasted serum insulin levels, and HOMA index after tempol treatment on a HFD for 17 weeks. n=5 mice per group. All data are presented as mean  $\pm$  SD. Analysis of variance followed by two-tailed Student's t-test. \* $P$ <0.05, \*\* $P$ <0.01 compared to vehicle treated mice.

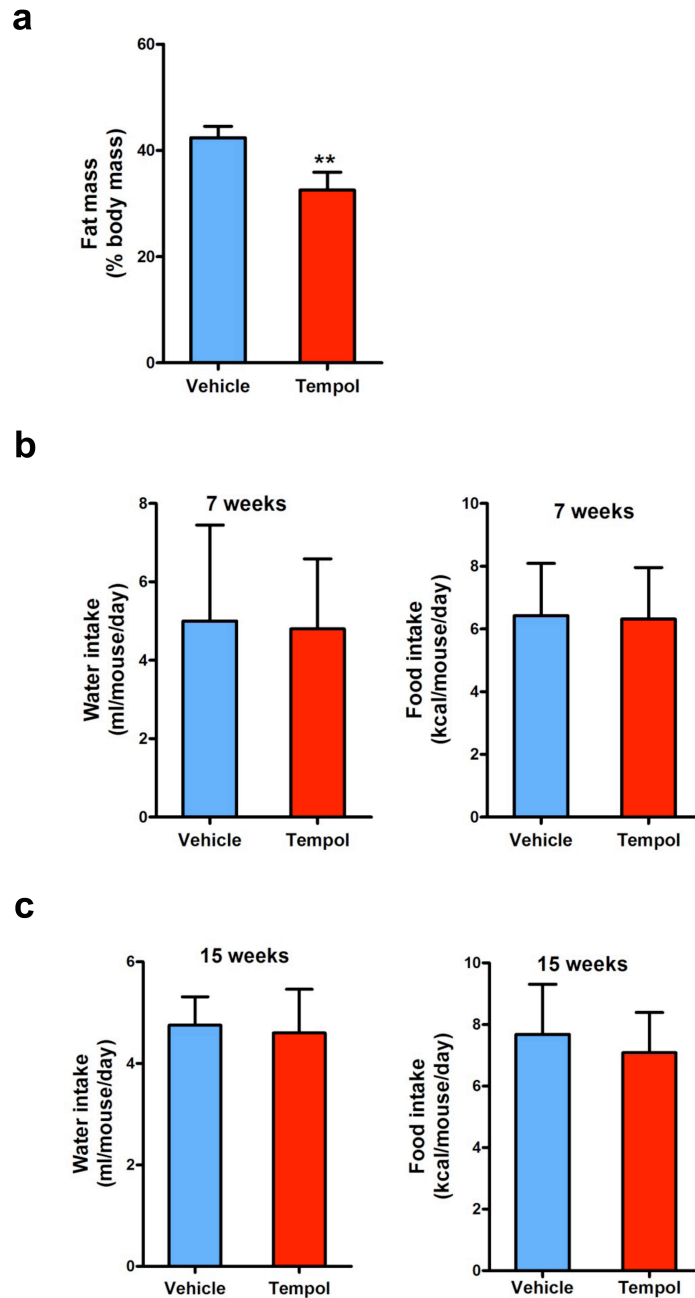

**Supplementary Figure S2. Tempol protected mice from HFD-induced obesity and glucose intolerance.**

**(a)** Fat mass to body mass ratio in vehicle and tempol-treated mice after 16 weeks of HFD. n=5 mice per group.

**(b)** Water and food intake in vehicle and tempol treated mice on an HFD measured after 7 weeks of treatment. n=5 mice per group.

**(c)** Water and food intake in vehicle and tempol treated mice on an HFD measured after 15 weeks of treatment. n=5 mice per group. All data are presented as mean  $\pm$  SD. Analysis of variance followed by two-tailed Student's t-test. \* $P < 0.05$  compared to vehicle treated mice.

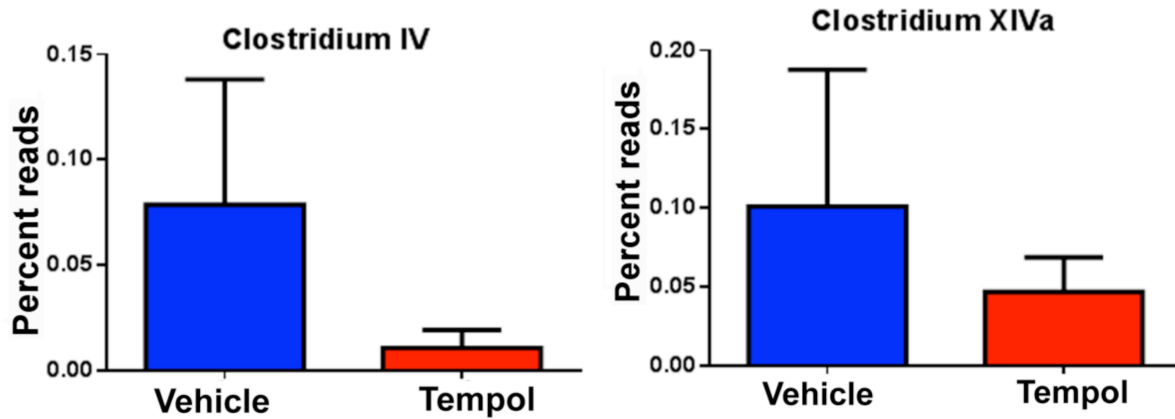

**Supplementary Figure S3. Tempol treatment induces gut microbiome robust shifts.**

(a) 16S rRNA gene sequencing analysis of genus *Clostridium* cluster IV and *Clostridium* cluster XIVa of cecum content after 5 days tempol treatment by gavage (250 mg/kg). n=3/vehicle group, n=4/tempol group. Data are presented as mean  $\pm$  SD.

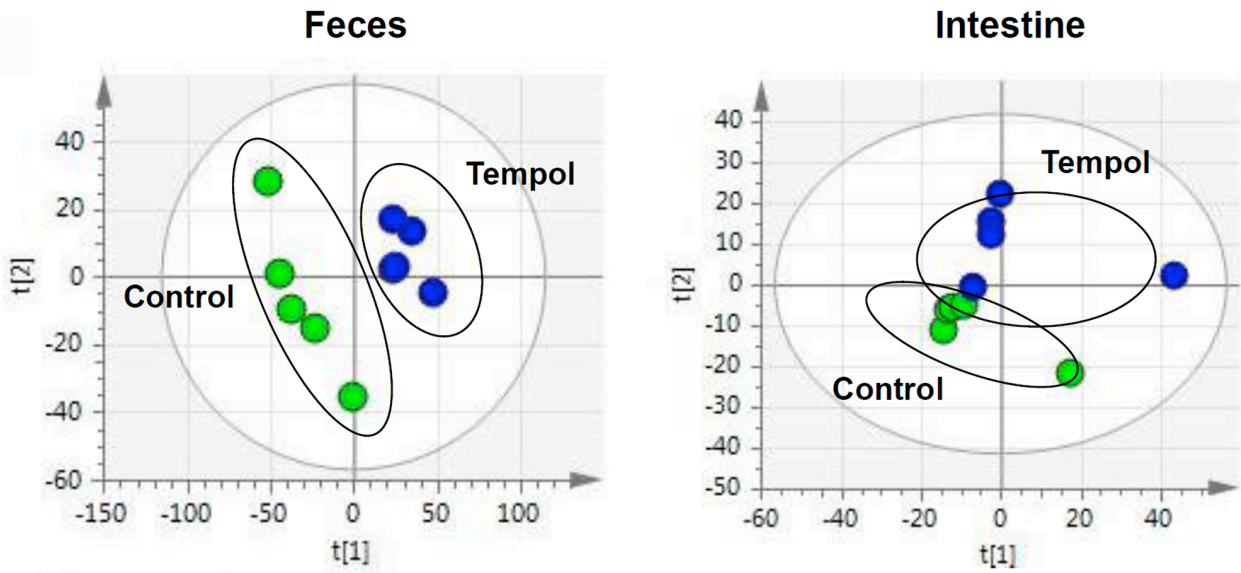

**Supplementary Figure S4. Metabolomics analysis of feces and intestine.**

PLS-DA of feces and intestine metabolites between control control (green closed circle) and tempol group (blue closed circle) in HFD. Each point represents an individual mouse sample. n=4-5 mice per group.

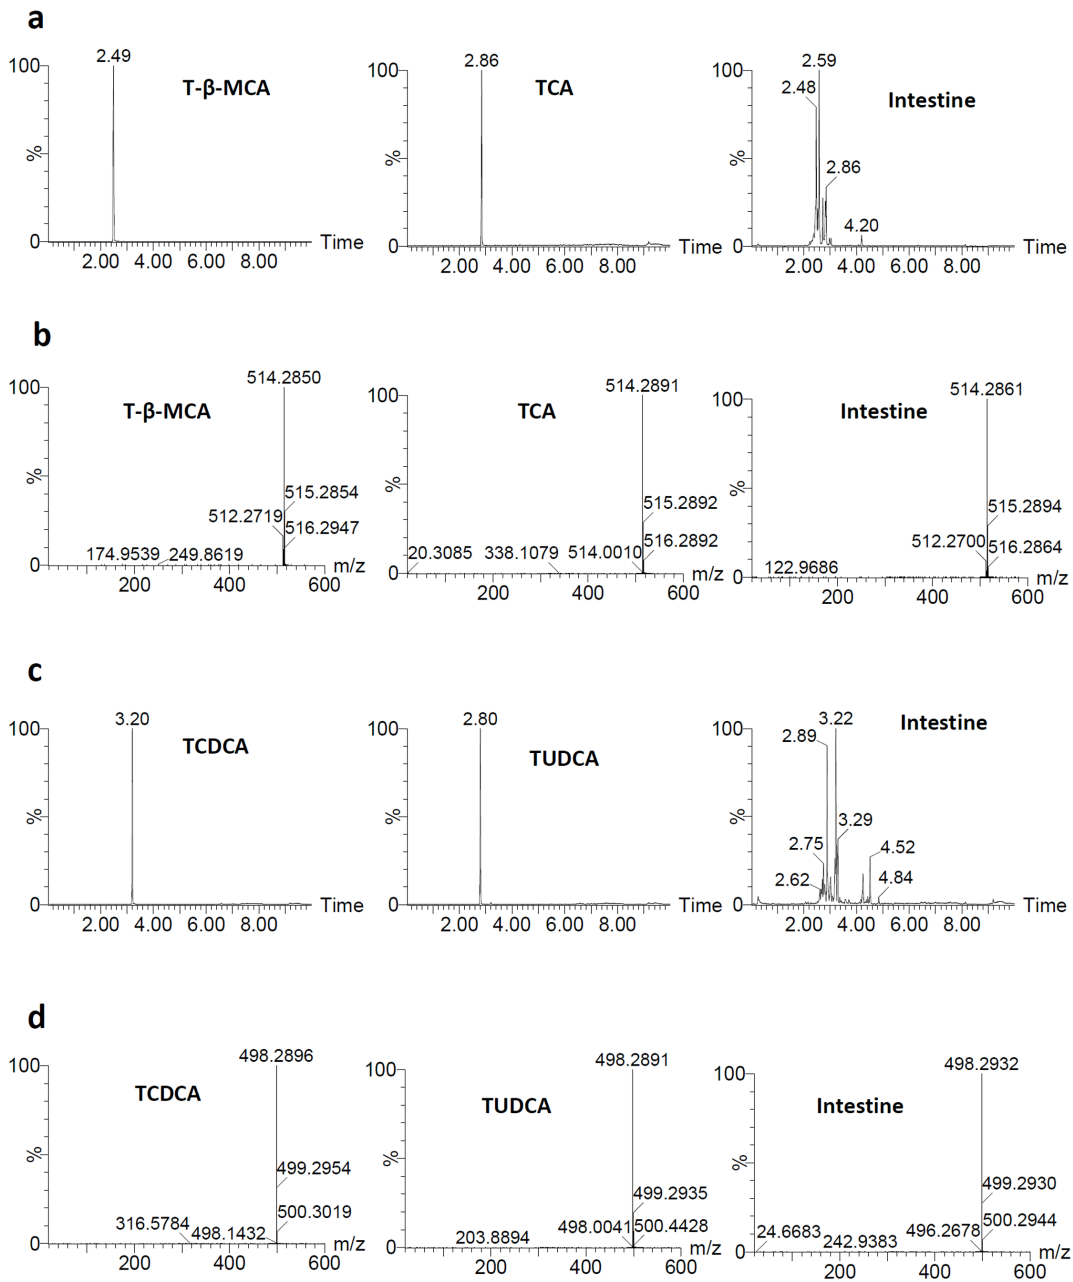

**Supplementary Figure S5. Validation of taurine-conjugated bile acids increased in the intestine by tempol.**

(a-d) Ion identification was performed by tandem mass spectrometry MS/MS fragmentation and retention time comparisons with authentic standards.

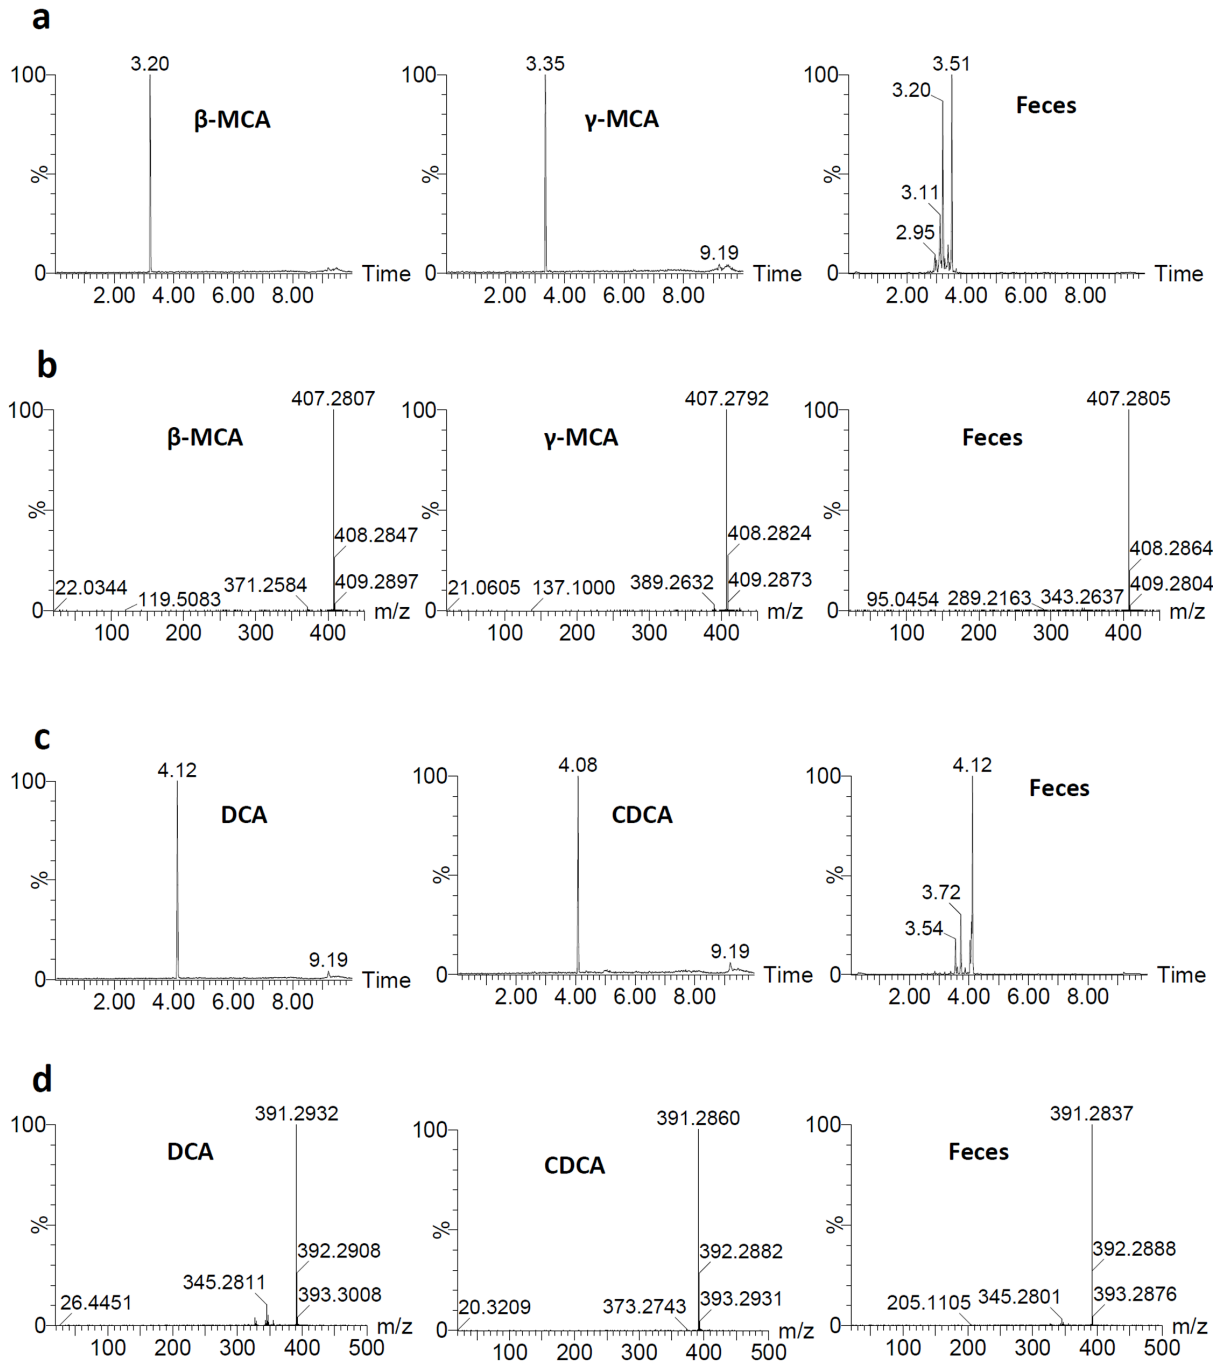

**Supplementary Figure S6. Validation of free bile acids increased in the feces by tempol.**  
**(a-d)** Ion identification was performed by tandem mass spectrometry MS/MS fragmentation and retention time comparisons with authentic standards.

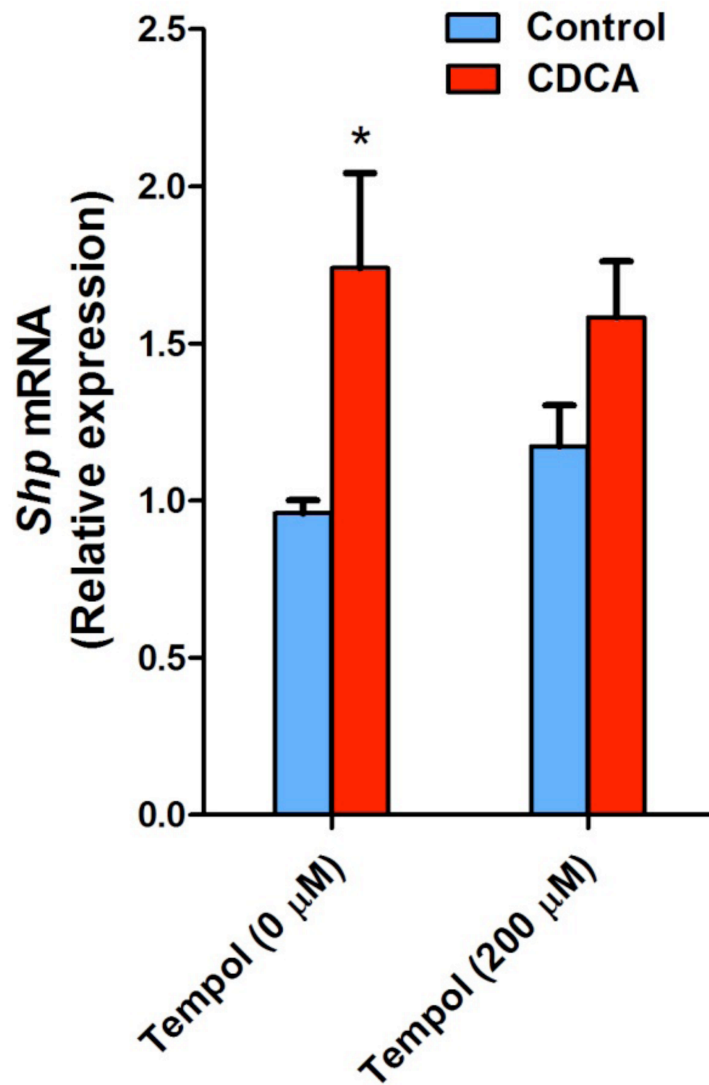

**Supplementary Figure S7. The influence of tempol on FXR signaling in HepG2 cells.** *Shp* mRNA expression was determined in HepG2 cells after treatment with 200 μM tempol and co-treatment of tempol with 100 μM chenodeoxycholic acid (CDCA) an FXR agonist. The expression was normalized to 18S RNA. n=3. All data are presented as mean ± SD. Analysis of variance followed by one-way ANOVA with Dunnett's test. \* $P < 0.01$  compared to control.



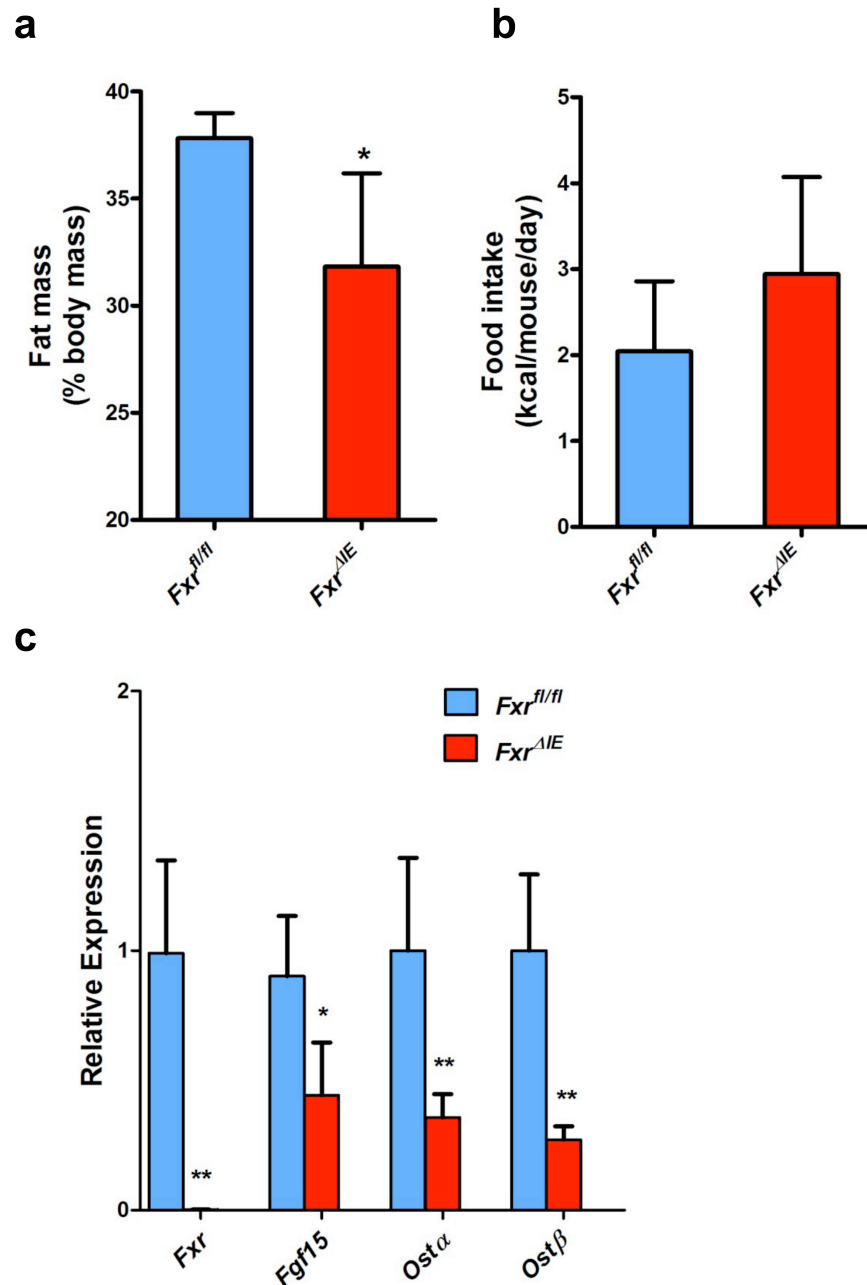

**Supplementary Figure S8 Intestine-specific FXR knockout mice are resistant to HFD-induced obesity and insulin resistance.**

(a) The fat mass to body mass ratio of the mice on 6 weeks of HFD. n =5/group.

(b) Food intake in *Fxr<sup>fl/fl</sup>* and *Fxr<sup>ΔIE</sup>* mice on an HFD measured after 14 weeks of treatment. Data are mean ± SD. n=5/group.

(c) qPCR analysis of *Fxr* and *Fxr* target genes in the intestinal mucosa on a HFD. Expression was normalized to 18S. n =5/group. All data are presented as mean ± SD. Analysis of variance followed by two-tailed Student's t-test. \* $P < 0.05$ , \*\* $P < 0.01$  compared to *Fxr<sup>fl/fl</sup>* mice.

### Sup Figure 9

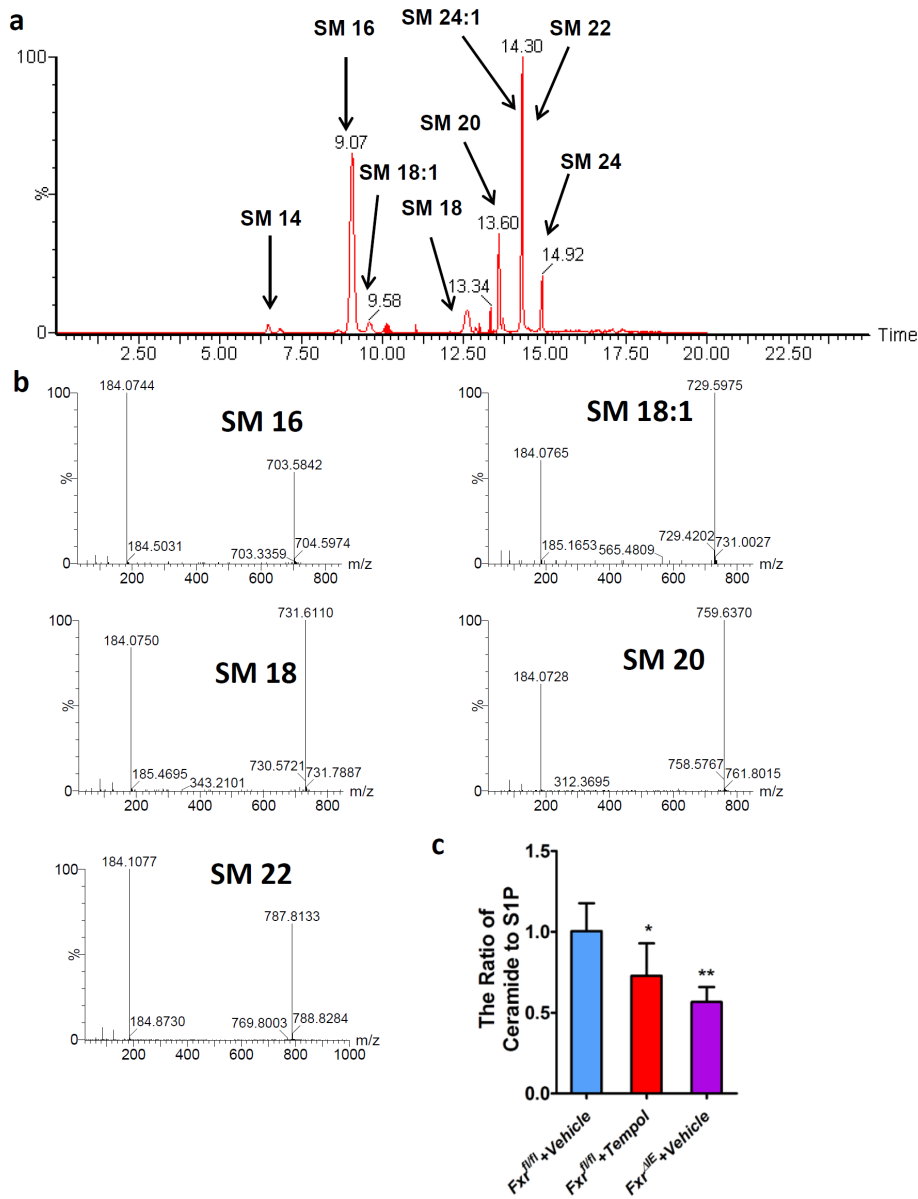

### Supplementary Figure S9. Lipidomics analysis of serum sphingolipid.

(a) Chromatogram of target analysis of serum sphingomyelin (SM).

(b) Tandem mass spectrometry MS/MS fragmentation of several typical SM, including SM 16, SM 18, SM 18:1, SM 20, and SM 22.

(c) The ratio of Ceramide to S1P in *Fxr*<sup>fl/fl</sup> (wild type)+vehicle, *Fxr*<sup>fl/fl</sup> (wild type)+tempol, and *Fxr*<sup>ΔIE</sup>+vehicle. Serum Ceramide is quantified by an ACQUITY UPLC system coupled with a XEVO triplequadrupole tandem mass spectrometer (Waters). Serum S1P is detected by the S1P ELISA kit. n =4-5/group. All data are presented as mean ± SD. Analysis of variance followed by two-tailed Student's t-test. \*\**P*<0.01 compared to *Fxr*<sup>fl/fl</sup> + vehicle mice.

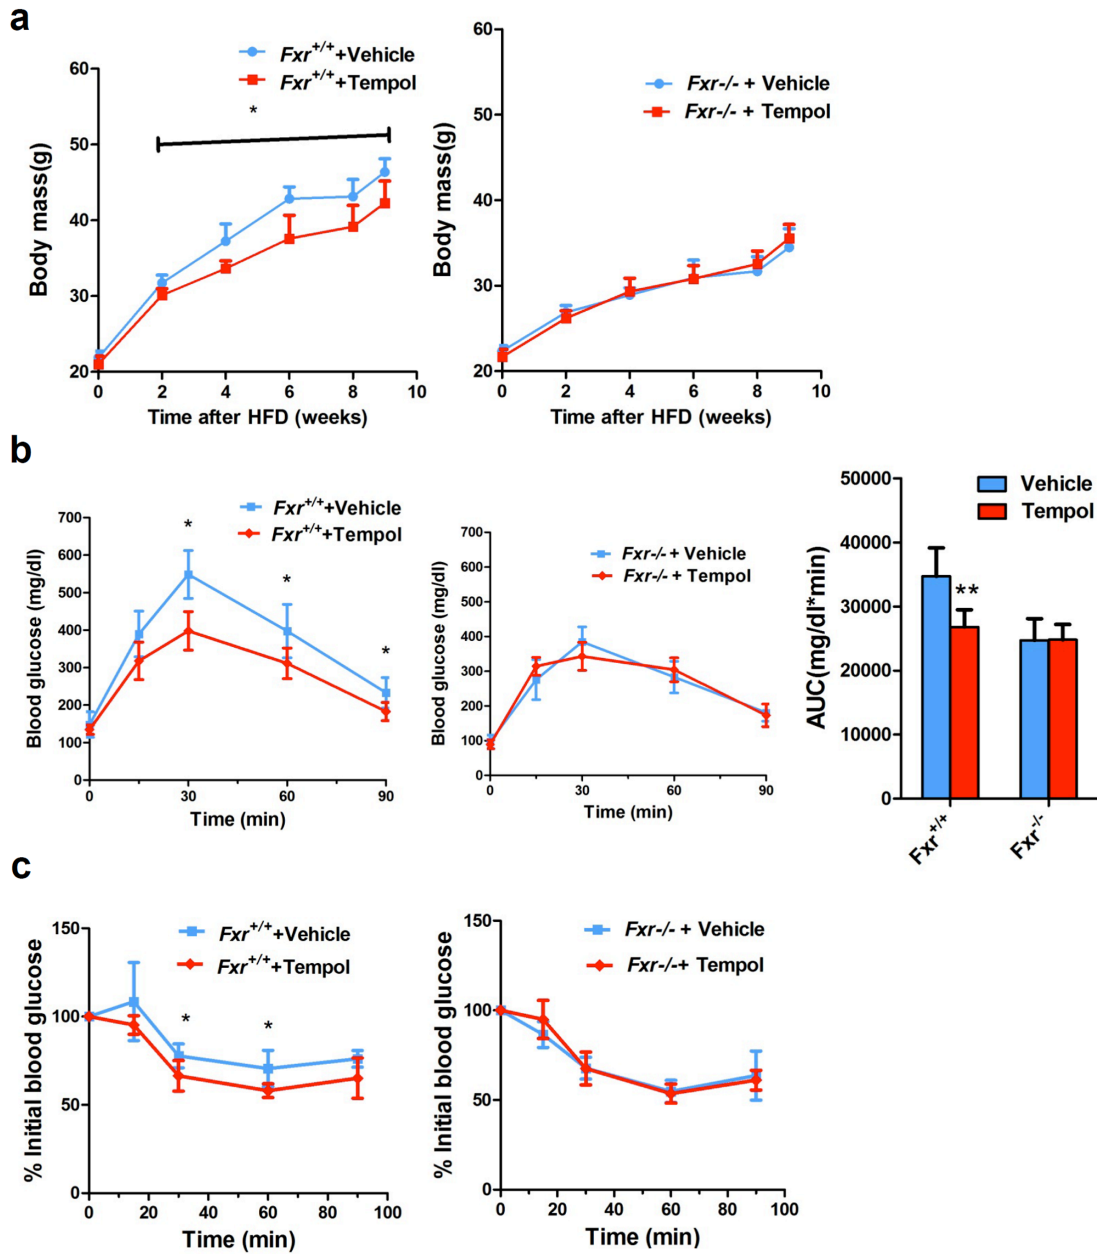

**Supplementary Figure S10. The inhibition of FXR is essential for tempol to ameliorate metabolic homeostasis.**

(a) Growth curves of vehicle and tempol-treated  $Fxr^{+/+}$  and  $Fxr^{-/-}$  mice on a HFD. n=5/group.  
 (b) Blood glucose levels in GTT and the area under the curve (AUC) of 8 weeks tempol-treated  $Fxr^{+/+}$  and  $Fxr^{-/-}$  mice maintained on a HFD. n=5/group.  
 (c) Insulin tolerance test (ITT) of 9 weeks after HFD. n=4-5/group.. All data are presented as mean  $\pm$  SD. Analysis of variance followed by two-tailed Student's t-test. \* $P$ <0.05, \*\* $P$ <0.01 compared to vehicle-treated mice at the same genotyping mice.

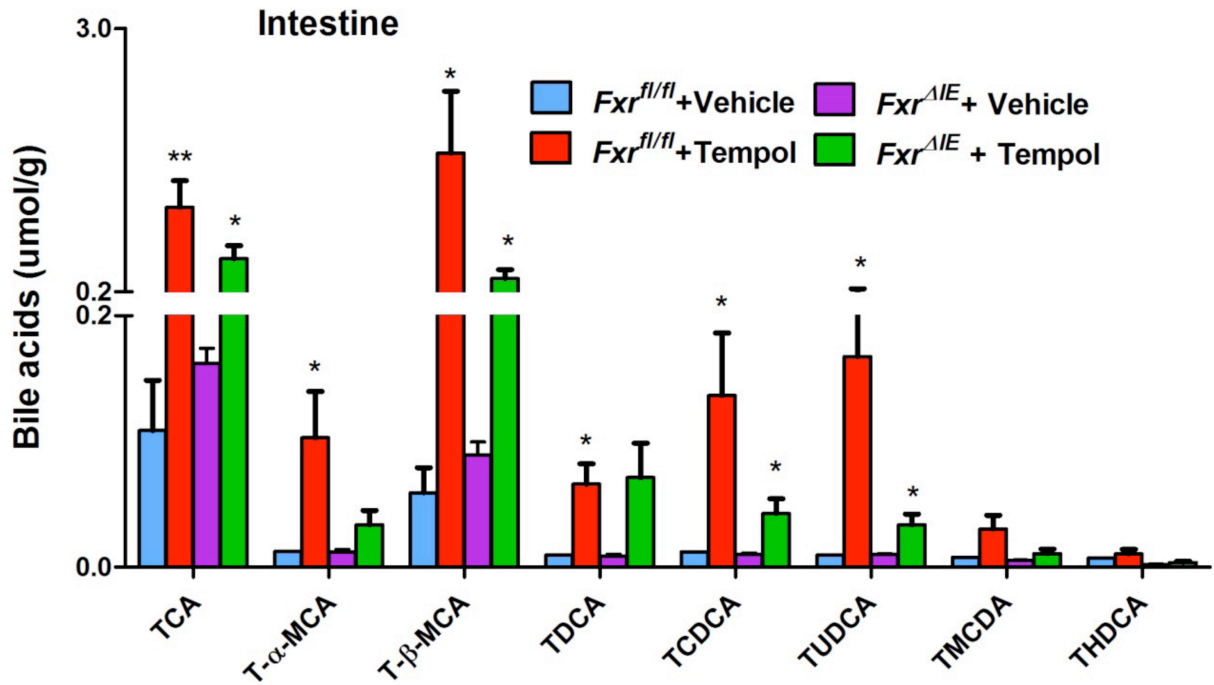

**Supplementary Figure S11. Metabolomics analysis identified the alteration of bile acid composition by tempol.**

Bile acid composition in intestine of  $Fxr^{fl/fl}$ +Vehicle,  $Fxr^{fl/fl}$  +Tempol,  $Fxr^{\Delta IE}$  + Vehicle, and  $Fxr^{\Delta IE}$  +Tempol. Bile acid composition was determined using UPLC-ESI-QTOFMS. n=5 mice per group. All data are presented as mean  $\pm$  SD. Analysis of variance followed by one-way ANOVA with Tukey's test. \* $P$ <0.05, \*\* $P$ <0.01 compared to vehicle treated mice of the same genotype.

**Supplementary Table S1. Primers used for qPCR.**

|                              |                                    |
|------------------------------|------------------------------------|
|                              |                                    |
| Bacterial Primers            | Sequence                           |
| All groups FWD               | 5'- ACT CCT ACG GGA GGC AGC AG -3' |
| All groups REV               | 5'- ATT ACC GCG GCT GCT GG -3'     |
| Firmicutes FWD               | 5'- GCA GTA GGG AAT CTT CCG -3'    |
| Firmicutes REV               | 5'- ATT ACC GCG GCT GCT GG -3'     |
| Bacteroidetes FWD            | 5'- GTA CTG AGA CAC GGA CCA -3'    |
| Bacteroidetes REV            | 5'- ATT ACC GCG GCT GCT GG -3'     |
| Actinobacteria FWD           | 5'- CGC GGC CTA TCA GCT TGT TG -3' |
| Actinobacteria REV           | 5'- ATT ACC GCG GCT GCT GG -3'     |
| $\alpha$ -Proteobacteria FWD | 5'- ACT CCT ACG GGA GGC AGC AG -3' |
| $\alpha$ -Proteobacteria REV | 5'- TCT ACG RAT TTC ACC YCT AC -3' |
| $\beta$ -Proteobacteria FWD  | 5'- ACT CCT ACG GGA GGC AGC AG -3' |
| $\beta$ -Proteobacteria REV  | 5'- TCA CTG CTA CAC GYG -3'        |
|                              |                                    |
| Mouse primers                | Sequence                           |
| 18S FWD                      | 5'- ATTGGAGCTGGAATTACCGC -3'       |
| 18S REV                      | 5'- CGGCTACCACATCCAAGGAA -3'       |
| <i>Fxr</i> FWD               | 5'- TGGGCTCCGAATCCTCTTAGA -3'      |
| <i>Fxr</i> REV               | 5'- TGGTCCTCAAATAAGATCCTTGG -3'    |
| <i>Shp</i> FWD               | 5'- TCTGCAGGTCGTCCGACTATTC -3'     |

|                   |                                   |
|-------------------|-----------------------------------|
| <i>Shp</i> REV    | 5'- AGGCAGTGGCTGTGAGATGC -3'      |
| <i>Cyp7a1</i> FWD | 5'- AACCAACCTGCCAGTACTAGATAGC -3' |
| <i>Cyp7a1</i> REV | 5'- GTGTAGAGTGAAGTCCTCCTTAGC -3'  |
| <i>Bsep</i> FWD   | 5'- TCTGACTCAGTGATTCTTCGCA -3'    |
| <i>Bsep</i> REV   | 5'- GTGTAGAGTGAAGTCCTCCTTAGC -3'  |
| <i>Fgf15</i> FWD  | 5'- GCCATCAAGGACGTCAGCA -3'       |
| <i>Fgf15</i> REV  | 5'- CTTCTCCGAGTAGCGAATCAG -3'     |
| <i>Osta</i> FWD   | 5'- TACAAGAACACCCTTTGCCC -3'      |
| <i>Osta</i> REV   | 5'- CGAGGAATCCAGAGACCAAA -3'      |
| <i>Ostβ</i> FWD   | 5'- GTATTTTCGTGCAGAAGATGCG -3'    |
| <i>Ostβ</i> REV   | 5'- TTTCTGTTTGCCAGGATGCTC -3'     |
| <i>Fabp1</i> FWD  | 5'- GGAATTGGGAGTAGGAAGAGCC -3'    |
| <i>Fabp1</i> REV  | 5'- TGGACTTGAACCAAGGAGTCAT -3'    |
| <i>Fabp2</i> FWD  | 5'- GTGGAAAGTAGACCGGAACGA -3'     |
| <i>Fabp2</i> REV  | 5'- CCATCCTGTGTGATTGTCAGTT -3'    |
| <i>Fabp3</i> FWD  | 5'- ACCTGGAAGCTAGTGGACAG -3'      |
| <i>Fabp3</i> REV  | 5'- TGGACTTGAACCAAGGAGTCAT -3'    |
| <i>Fabp4</i> FWD  | 5'- AAGGTGAAGAGCATCATAACCCT -3'   |
| <i>Fabp4</i> REV  | 5'- TCACGCCTTTCATAACACATTCC -3'   |
| <i>Fabp6</i> FWD  | 5'- CTTCCAGGAGACGTGATTGAAA -3'    |
| <i>Fabp6</i> REV  | 5'- AACTTGTTGCTCATAATGTTGCC -3'   |
| <i>Ppara</i> FWD  | 5'- CCCAAGGGAGGAATAGCTTCT -3'     |
| <i>Ppara</i> REV  | 5'- CTCTGCGATGCGGTTCCAA -3'       |
| <i>Cpt1</i> FWD   | 5'- TCTTCACTGAGTTCCGATGGG -3'     |

|                  |                                |
|------------------|--------------------------------|
| <i>Cpt1</i> REV  | 5'- ACGCCAGAGATGCCTTTTCC -3'   |
| <i>Cpt2</i> FWD  | 5'- CAGCACAGCATCGTACCCA -3'    |
| <i>Cpt2</i> REV  | 5'- TCCCAATGCCGTTCTCAAAT-3'    |
| <i>Acox1</i> FWD | 5'- CCGCCACCTTCAATCCAGAG -3'   |
| <i>Acox1</i> REV | 5'- CAAGTTCTCGATTTCTCGACGG -3' |
| <i>Acox2</i> FWD | 5'- AACCCAGGGGATCGAGTGT -3'    |
| <i>Acox2</i> REV | 5'- CGCAGCTCAGTGTTTGGGAT -3'   |
| <i>Cd36</i> FWD  | 5'- GCGACATGATTAATGGCACA -3'   |
| <i>Cd36</i> REV  | 5'- CCTGCAAATGTCAGAGGAAA -3'   |
| <i>Acs1</i> FWD  | 5'- TGCCAGAGCTGATTGACATTC -3'  |
| <i>Acs1</i> REV  | 5'- GGCATACCAGAAGGTGGTGAG -3'  |
| <i>Acsm</i> FWD  | 5'- CTTTGGCCCCAGCAGTAGATG -3'  |
| <i>Acsm</i> REV  | 5'- GGCTGTCACTGGCATATTCAT-3'   |
|                  |                                |
| Human primers    | Sequence                       |
| 18S FWD          | 5'- GATATGCTCATGTGGTGTTG -3'   |
| 18S REV          | 5'- AATCTTCTTCAGTCGCTCCA -3'   |
| <i>Shp</i> FWD   | 5'- AGGGACCATCCTCTTCAACC -3'   |
| <i>Shp</i> REV   | 5'- ACTTCACACAGCACCCAGTG -3'   |
